# Supplementary material for: New photoluminescent iodoargentates with bisimidazole derivatives as countercations
Source: Royal Society of Chemistry journal article supplement (doi:10.1039/c8ra05760e), 2018-01-01
Supplement: c8ra05760e1.pdf [file c8ra05760e1.pdf]

# Supporting Information

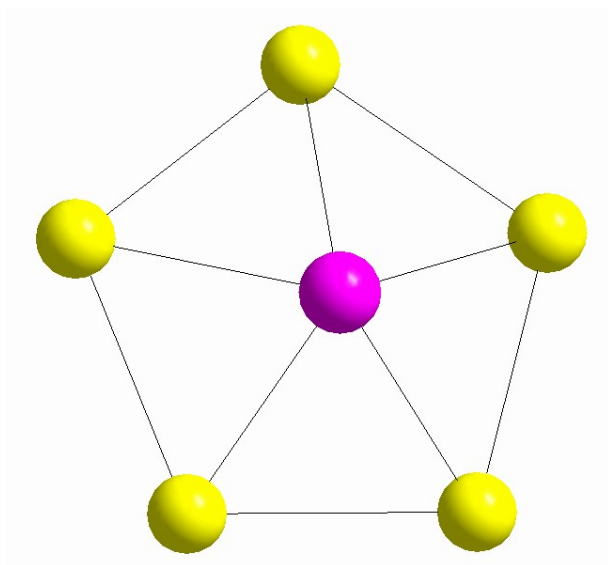

Fig. S1 Coordination mode of I1 and I2 in 1.

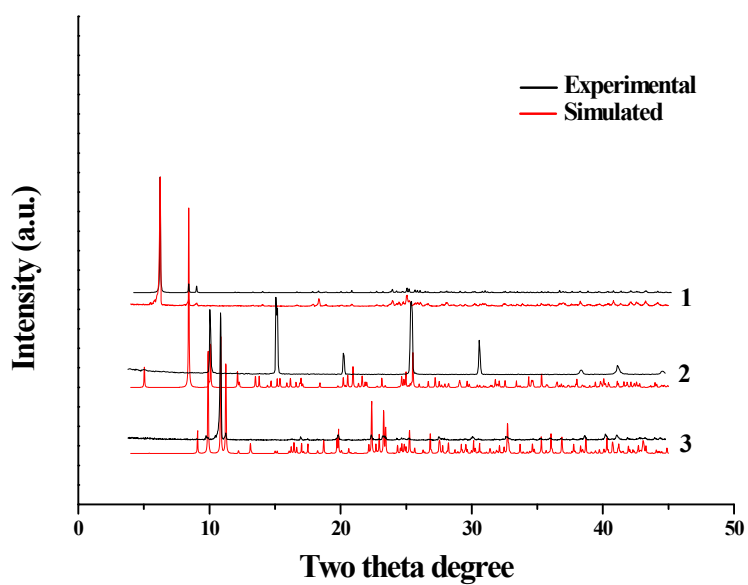

Fig. S2 Coordination mode of I1 and I2 in 1.

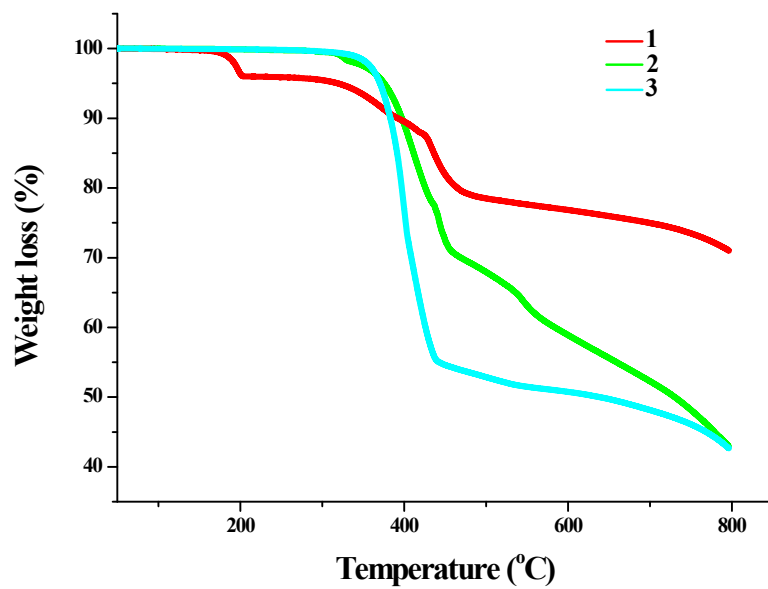

Fig. S3 IR spectra of 1-3.

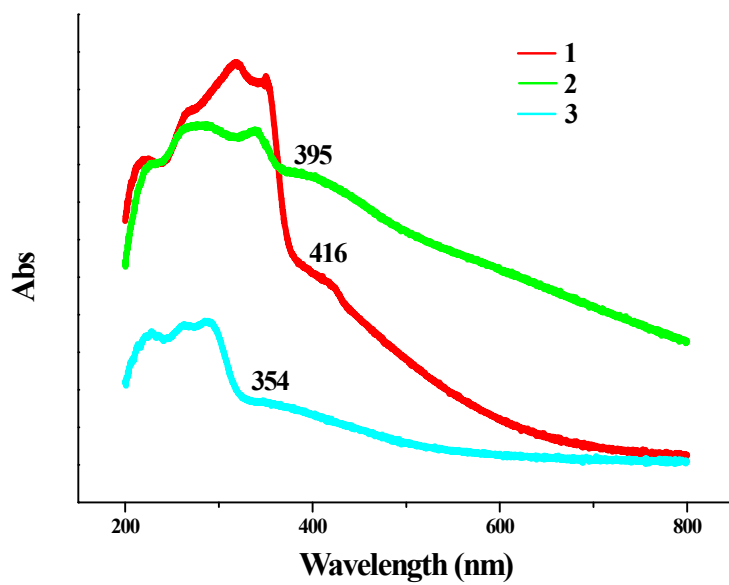

Fig. S4 UV-vis spectra of 1-3.

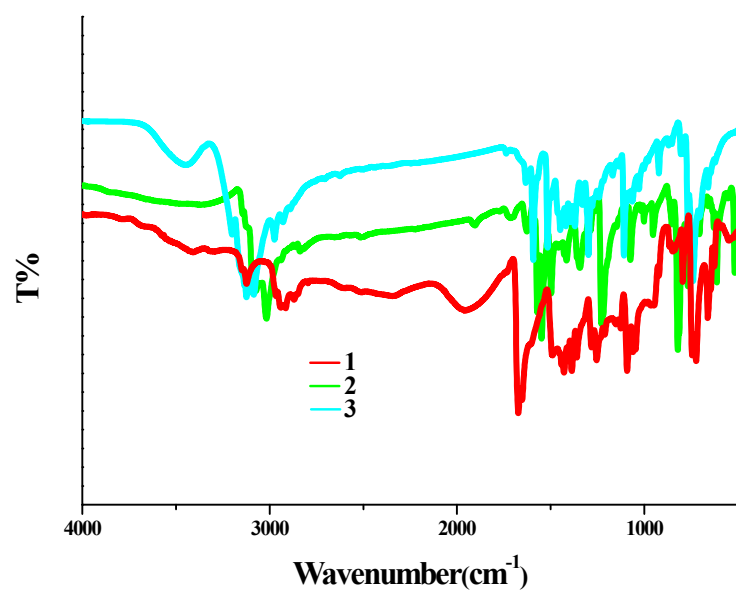

Fig. S5 IR spectra of 1-3.

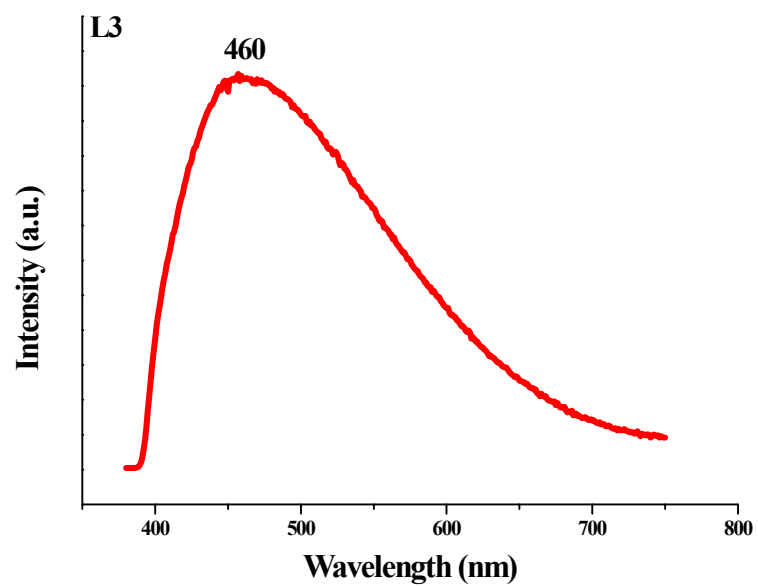

Fig. S6 Emission spectrum of L3 excited at 360 nm.

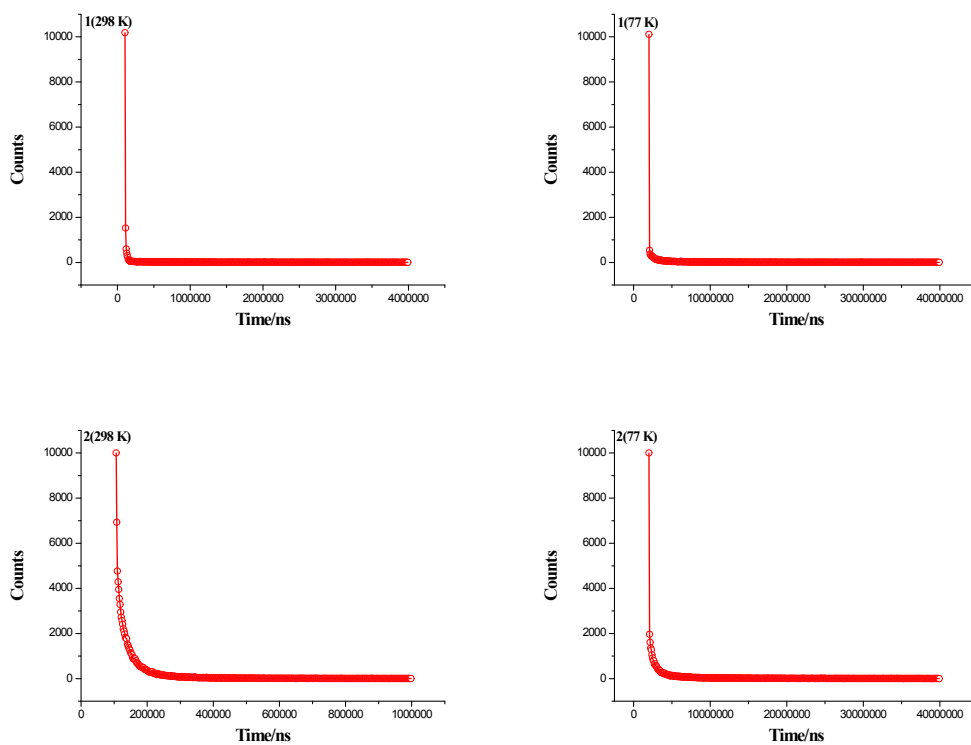

Fig. S7 Decay curves of 1-2 at 298 K and 77 K.

Table S1 Hydrogen bonds in (Å) and (°) for 1-3.

| D-H...A     | <i>d</i> (D-H) | <i>d</i> (H...A) | <i>d</i> (D...A) | ∠DHA  |
|-------------|----------------|------------------|------------------|-------|
| <b>1</b>    |                |                  |                  |       |
| N1-H...N2a  | 0.86           | 1.85             | 2.707(9)         | 177.4 |
| <b>2</b>    |                |                  |                  |       |
| C13-H...I4c | 0.93           | 2.9              | 3.595(7)         | 132.5 |
| <b>3</b>    |                |                  |                  |       |
| N1-H...I1b  | 0.86           | 2.74             | 3.489(3)         | 145.9 |
| N3-H...I3   | 0.86           | 2.67             | 3.500(3)         | 161.5 |
| C5-H...I2c  | 0.93           | 3.31             | 3.884(4)         | 122.1 |

Symmetry transformations: a:  $x+1/2, -y+1/2, z$  for **1**; c:  $-x+1, -y+2, -z+1$  for **2**; b:  $x-1, y, z+1$ ; c:  $-x+1, y-1/2, -z+3/2$  for **3**
